# Supplementary material for: Relationship between intended force and actual force: comparison between athletes and non-athletes
Source: PeerJ. 2024 Apr 3;12:e17156. doi: 10.7717/peerj.17156 (PMC10998631; doi:10.7717/peerj.17156)
Supplement: Supplemental Information 1 [file peerj-12-17156-s001.xlsx]

## Sheet: Accuracy_database
Group	BAL-LOW (25%)	BAL-MID (50%)	BAL-HIGH (75%)	TON-LOW (25%)	TON-MID (50%)	TON-HIGH (75%)
ATHL	2.88	35.76	53.8	10.59	36.58	59.71
ATHL	0.33	13.86	26.92	7.81	17.75	11.91
ATHL	25.92	17.08	6.77	7.07	9.02	14.63
ATHL	20.13	2.1	1.46	20.15	6.52	6.89
ATHL	9.3	2.56	37.3	6.38	9.79	44.87
ATHL	15.2	4.69	11.92	3.12	19.85	32.29
ATHL	12.94	0.98	12.18	8.92	2.81	17.44
ATHL	8.87	19.35	33.42	8.6	21.39	34.33
ATHL	11.77	3.47	12.95	11.37	28.05	38.36
ATHL	14.11	2.36	21.52	2.64	3.46	24.04
ATHL	19.08	17.04	18.2	11.79	1.95	1.27
ATHL	0.6	10.08	8.88	0.1	11.76	32.6
ATHL	11.03	1.78	24.96	11.59	9.7	7.87
ATHL	22.62	6.97	17.48	7.42	12.01	37.16
ATHL	4.55	3.67	23.6	0.91	22.52	37.62
ATHL	6.73	22.36	37.03	8.81	31.09	33.01
ATHL	5.53	6.16	29.77	0.55	15.83	14.65
ATHL	30.69	7.88	5.21	4.34	25.09	49.81
ATHL	4	12.28	37.06	17.9	33.43	38.98
ATHL	6.77	4.59	18.46	8.12	20.44	47.2
NON-ATHL	11.84	1.97	6.01	1.92	3.1	6.76
NON-ATHL	9.75	28.81	52.93	18.72	38.92	66.71
NON-ATHL	10.79	35.07	44.56	12.46	19.11	24.89
NON-ATHL	6.6	17.83	32.35	9.62	27.51	32.29
NON-ATHL	3.09	9.84	26.21	2.6	16.95	36.5
NON-ATHL	10.12	9.89	18.5	19.01	32.03	45.12
NON-ATHL	5.23	1.07	22.78	3.31	16.09	24.44
NON-ATHL	14.3	12.26	11.65	11.32	34.17	53.65
NON-ATHL	10.39	8.93	4.08	15.52	28.28	49.31
NON-ATHL	10.97	26.32	43.8	22.19	44.37	50.87
NON-ATHL	38.71	27	6.26	0.58	19.43	44.55
NON-ATHL	19.55	36.19	59.15	18.93	35.58	56.74
NON-ATHL	10.28	15.11	19.29	0.68	16.89	34.71
NON-ATHL	20.3	26.97	9.11	13.68	20.21	50.99
NON-ATHL	9.08	14.16	25.58	18.18	36.44	52.87
NON-ATHL	7.58	2.52	14.46	9.8	14.67	11.94
NON-ATHL	19.93	2.11	23	10.5	14.51	34.69
NON-ATHL	2.88	8.68	26.85	6.11	11.67	48.01
NON-ATHL	11.76	7.75	15.15	15.57	29.32	33.72
NON-ATHL	9.11	1.09	23.85	8.77	27.57	39.53
