# Supplementary material for: Relationship between intended force and actual force: comparison between athletes and non-athletes
Source: PeerJ. 2024 Apr 3;12:e17156. doi: 10.7717/peerj.17156 (PMC10998631; doi:10.7717/peerj.17156)
Supplement: Supplemental Information 2 [file peerj-12-17156-s002.xlsx]

## Sheet: Likert_database
Group	BAL-LOW (25%)	BAL-MID (50%)	BAL-HIGH (75%)	TON-LOW (25%)	TON-MID (50%)	TON-HIGH (75%)
ATHL	11	13	10	14	14	16
ATHL	11	10	15	12	16	16
ATHL	14	13	14	14	14	15
ATHL	13	15	15	17	17	16
ATHL	7	11	10	11	14	14
ATHL	12	14	13	13	16	14
ATHL	15	17	16	14	14	16
ATHL	9	15	14	14	13	15
ATHL	12	16	15	14	15	17
ATHL	7	14	13	12	16	16
ATHL	14	12	17	12	14	17
ATHL	14	11	12	13	14	14
ATHL	14	10	10	13	14	14
ATHL	18	18	16	18	20	20
ATHL	7	6	7	11	11	10
ATHL	10	7	9	12	14	15
ATHL	14	17	16	11	17	13
ATHL	11	14	15	13	14	12
ATHL	18	13	15	18	17	16
ATHL	8	12	7	18	11	10
NON-ATHL	15	13	15	17	16	16
NON-ATHL	11	11	11	14	11	11
NON-ATHL	13	14	13	16	15	15
NON-ATHL	11	17	14	15	17	18
NON-ATHL	8	9	12	12	11	13
NON-ATHL	10	7	12	14	12	15
NON-ATHL	14	15	13	17	14	17
NON-ATHL	17	14	16	17	13	14
NON-ATHL	15	7	9	11	13	14
NON-ATHL	12	10	14	12	16	10
NON-ATHL	12	14	13	15	17	17
NON-ATHL	12	8	12	13	14	15
NON-ATHL	17	16	15	18	13	14
NON-ATHL	13	12	16	13	13	16
NON-ATHL	12	10	12	12	12	14
NON-ATHL	10	11	9	9	10	11
NON-ATHL	8	13	15	15	12	17
NON-ATHL	8	6	8	12	9	13
NON-ATHL	15	14	10	17	16	15
NON-ATHL	16	14	12	17	18	14
