# Supplementary material for: Relationship between intended force and actual force: comparison between athletes and non-athletes
Source: PeerJ. 2024 Apr 3;12:e17156. doi: 10.7717/peerj.17156 (PMC10998631; doi:10.7717/peerj.17156)
Supplement: Supplemental Information 3 [file peerj-12-17156-s003.xlsx]

## Sheet: Tonic_condition
Athletes	0.25	0.5	0.75		Non-Athletes	0.25	0.5	0.75
1	14.41	13.42	15.29		1	23.08	53.1	68.24
2	17.19	67.75	63.09		2	6.28	11.08	8.29
3	32.07	40.98	60.37		3	12.54	30.89	50.11
4	45.15	56.52	81.89		4	15.38	22.49	42.71
5	18.62	40.21	30.13		5	22.4	33.05	38.5
6	28.12	30.15	42.71		6	5.99	17.97	29.88
7	33.92	47.19	57.56		7	21.69	33.91	50.56
8	16.4	28.61	40.67		8	13.68	15.83	21.35
9	13.63	21.95	36.64		9	9.48	21.72	25.69
10	27.64	46.54	50.96		10	2.81	5.63	24.13
11	36.79	51.95	73.73		11	24.42	30.57	30.45
12	24.9	38.24	42.4		12	6.07	14.42	18.26
13	36.59	59.7	67.13		13	24.32	33.11	40.29
14	17.58	37.99	37.84		14	11.32	29.79	24.01
15	25.91	27.48	37.38		15	6.82	13.56	22.13
16	16.19	18.91	41.99		16	34.8	35.33	63.06
17	25.55	34.17	60.35		17	35.5	35.49	40.31
18	20.66	24.91	25.19		18	18.89	38.33	26.99
19	7.1	16.57	36.02		19	9.43	20.68	41.28
20	16.88	29.56	27.8		20	16.23	22.43	35.47

## Sheet: Ballistic_condition
Athletes	0.25	0.5	0.75		Non-Athletes	0.25	0.5	0.75
1	22.12	14.24	21.2		1	36.84	51.97	81.01
2	25.33	36.14	48.08		2	15.25	21.19	22.07
3	50.92	67.08	81.77		3	14.21	14.93	30.44
4	45.13	52.1	76.46		4	18.4	32.17	42.65
5	34.3	47.44	37.7		5	28.09	40.16	48.79
6	40.2	54.69	63.08		6	35.12	40.11	56.5
7	37.94	50.98	62.82		7	30.23	48.93	52.22
8	16.13	30.65	41.58		8	39.3	62.26	63.35
9	36.77	53.47	62.05		9	35.39	41.07	79.08
10	39.11	47.64	53.48		10	14.03	23.68	31.2
11	44.08	67.04	56.8		11	63.71	77	81.26
12	24.4	39.92	66.12		12	5.45	13.81	15.85
13	36.03	48.22	50.04		13	35.28	34.89	55.71
14	47.62	56.97	57.52		14	45.3	76.97	84.11
15	29.55	53.67	51.4		15	15.92	35.84	49.42
16	18.27	27.64	37.97		16	32.58	52.52	60.54
17	30.53	43.84	45.23		17	44.93	47.89	52
18	55.69	57.88	69.79		18	27.88	58.68	48.15
19	21	37.72	37.94		19	36.76	57.75	59.85
20	31.77	54.59	56.54		20	34.11	48.91	51.15
